# Supplementary material
Source: PubMed Central journal article supplement (PMC2823547)
Supplement: supp_M109.056523_jbc.M109.056523-1.pdf [file supp_M109.056523_jbc.M109.056523-1.pdf]

**Supplementary Table 1. Genes associated with the EMT shown for the microarray analysis in Figure 1G.**

| Gene            | Protein                                                   |
|-----------------|-----------------------------------------------------------|
| <i>TJP1</i>     | Tight junction protein 1 (zonula occludens 1)             |
| <i>ID1</i>      | Inhibitor of DNA binding 1                                |
| <i>ID2</i>      | Inhibitor of DNA binding 2                                |
| <i>EZR</i>      | Ezrin                                                     |
| <i>KRT18</i>    | Keratin 18                                                |
| <i>MUC1</i>     | Mucin 1                                                   |
| <i>THBS1</i>    | Thrombospondin 1                                          |
| <i>VIM</i>      | Vimentin                                                  |
| <i>CDH1</i>     | Cadherin 1 (E-cadherin)                                   |
| <i>TWIST1</i>   | Twist homolog 1                                           |
| <i>SERPINE1</i> | Serpin peptidase inhibitor, clade E                       |
| <i>TGFB2</i>    | Transforming growth factor, beta 2                        |
| <i>SNAI2</i>    | Snail homolog 2                                           |
| <i>SNAI1</i>    | Snail homolog 1                                           |
| <i>CTNNB1</i>   | Catenin (cadherin-associated protein), beta 1             |
| <i>COL1A1</i>   | Collagen, type I, alpha 1                                 |
| <i>RDX</i>      | Radixin                                                   |
| <i>TGFB1</i>    | Transforming growth factor, beta 1                        |
| <i>CD44</i>     | CD44                                                      |
| <i>MMP9</i>     | Matrix metalloproteinase 9                                |
| <i>FNI</i>      | Fibronectin 1                                             |
| <i>FGF2</i>     | Fibroblast growth factor 2                                |
| <i>CDH2</i>     | Cadherin 2 (N-cadherin)                                   |
| <i>MSN</i>      | Moesin                                                    |
| <i>SDC1</i>     | Syndecan 1                                                |
| <i>RHOA</i>     | Ras homolog gene family, member A (RhoA)                  |
| <i>ETS1</i>     | v-Ets erythroblastosis virus E26 oncogene homolog 1       |
| <i>FGF1</i>     | Fibroblast growth factor 1                                |
| <i>MMP3</i>     | Matrix metalloproteinase 3 (stromelysin 1, progelatinase) |
| <i>TCF3</i>     | Transcription factor 3                                    |
| <i>HAS2</i>     | Hyaluronan synthase 2                                     |
| <i>MMP2</i>     | Matrix metalloproteinase 2                                |
| <i>SPARC</i>    | Secreted protein, acidic, cysteine-rich (osteonectin)     |
| <i>ITGAV</i>    | Integrin, alpha V                                         |
